# Supplementary material for: Nanospheres from coordination polymers of Ag+ with a highly hydrophilic thiol ligand formed in situ from dynamic covalent binding and a hydrophobic thiol
Source: Royal Society of Chemistry journal article supplement (doi:10.1039/d1nj03609b), 2021-01-01
Supplement: d1nj03609b1.pdf [file d1nj03609b1.pdf]

Electronic Supplementary Material (ESI) for New Journal of Chemistry.  
This journal is © The Royal Society of Chemistry and the Centre  
National de la Recherche Scientifique 2021.

## Supporting Information

### **Nanospheres from coordination polymers of Ag<sup>+</sup> with a highly hydrophilic thiol ligand *in situ* formed from dynamic covalent binding and a hydrophobic thiol**

Yan Xu,<sup>a</sup> Xiao-Sheng Yan,<sup>a</sup> Si-Bo Zhang,<sup>b</sup> Shao-Wei Li,<sup>b</sup> Ning-Shao Xia,<sup>b</sup> Tao Jiang,<sup>a</sup> Zhao Li<sup>a</sup>  
and Yun-Bao Jiang<sup>\*,a</sup>

<sup>a</sup> Department of Chemistry, College of Chemistry and Chemical Engineering, the MOE Key Laboratory of Spectrochemical Analysis and Instrumentation, and *i*ChEM, Xiamen University, Xiamen 361005, China.

<sup>b</sup> State Key Laboratory of Molecular Vaccinology and Molecular Diagnostics, School of Life Sciences, School of Public Health, Xiamen University, Xiamen 361102, China; National Institute of Diagnostics and Vaccine Development in Infectious Disease, Xiamen University, Xiamen 361102, China

*E-mail: ybjiang@xmu.edu.cn*

## Table of Contents

|                                                       |           |
|-------------------------------------------------------|-----------|
| <b>1. Supplementary Spectral Data and Images.....</b> | <b>S2</b> |
|-------------------------------------------------------|-----------|

## 1. Supplementary Spectral Data

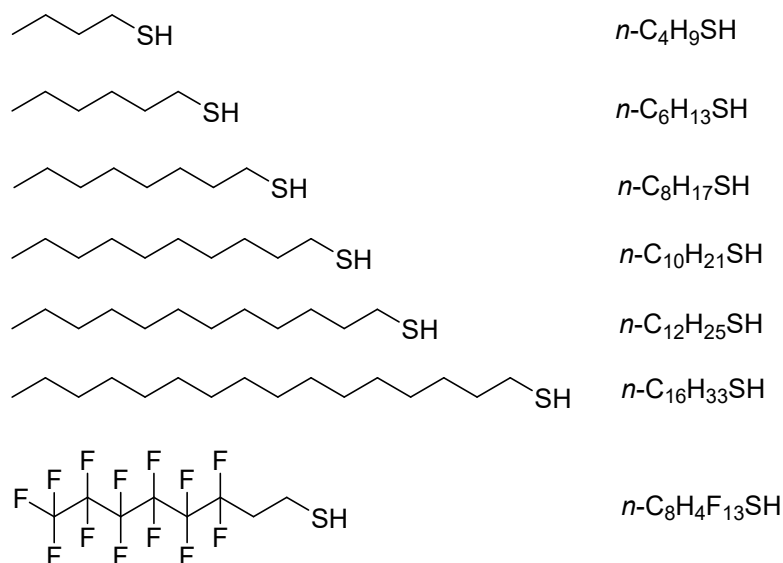

**Scheme S1** Chemical structures of  $n\text{-C}_n\text{H}_{2n+1}\text{SH}$  and their fluorinated derivative  $n\text{-C}_8\text{H}_4\text{F}_{13}\text{SH}$ .

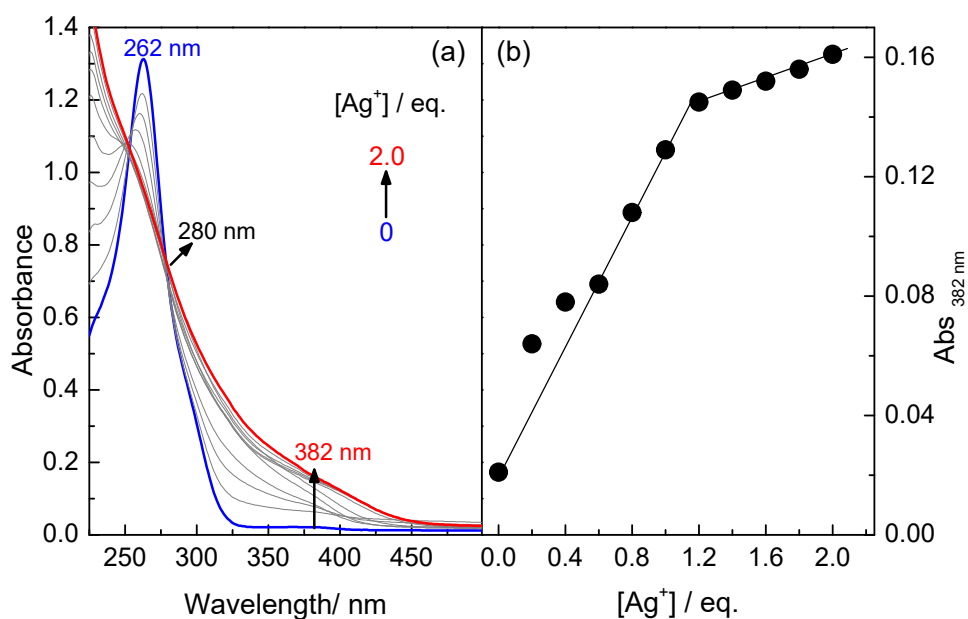

**Fig. S1** (a) Absorption spectra of (4-MPBA+D-glucose) in the presence of  $\text{Ag}^+$  of increasing concentration in 100 mM  $\text{Na}_2\text{CO}_3\text{-NaHCO}_3$  buffer solution of pH 10.5 and (b) absorbance at 382 nm versus equivalent of  $\text{Ag}^+$ .  $[\text{4-MPBA}] = 100 \mu\text{M}$ ,  $[\text{D-glucose}] = 3 \text{ mM}$ ,  $[\text{Ag}^+] = 0 - 2.0 \text{ eq.}$

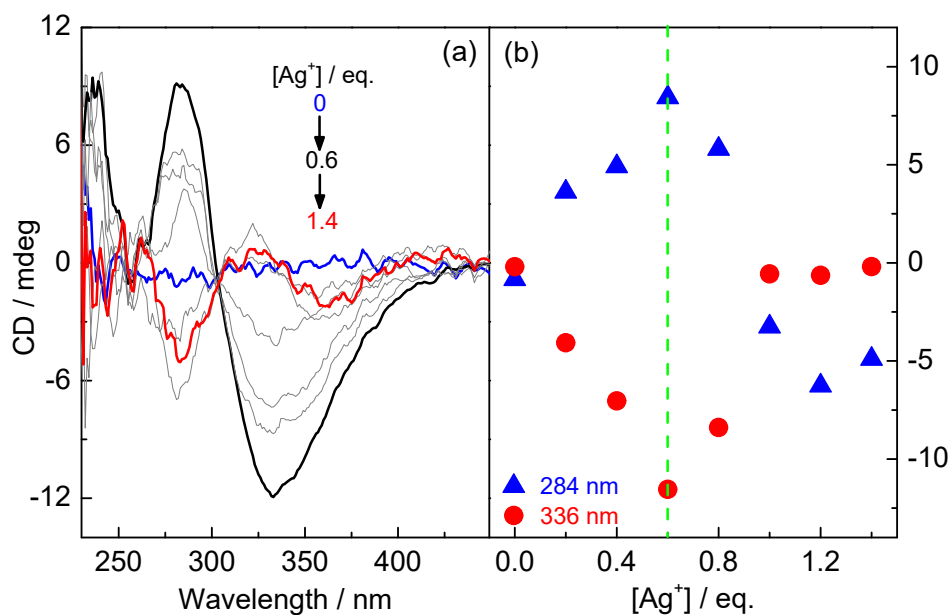

**Fig. S2** (a) CD spectra (4-MPBA+D-glucose) in the presence of  $\text{Ag}^+$  of increasing concentration in 100 mM  $\text{Na}_2\text{CO}_3$ - $\text{NaHCO}_3$  buffer solution of pH 10.5 and (b) plots of CD signals at 284 nm and 336 nm versus equivalent of  $\text{Ag}^+$ . [4-MPBA] = 100  $\mu\text{M}$ , [D-glucose] = 3 mM, [ $\text{Ag}^+$ ] = 0 - 1.4 eq. Note that in the absence of D-glucose the coordination polymers of  $\text{Ag}^+$  with 4-MPBA are CD silent because there is no chiral element, despite their formation is suggested by variations in the absorption (Fig. S3).

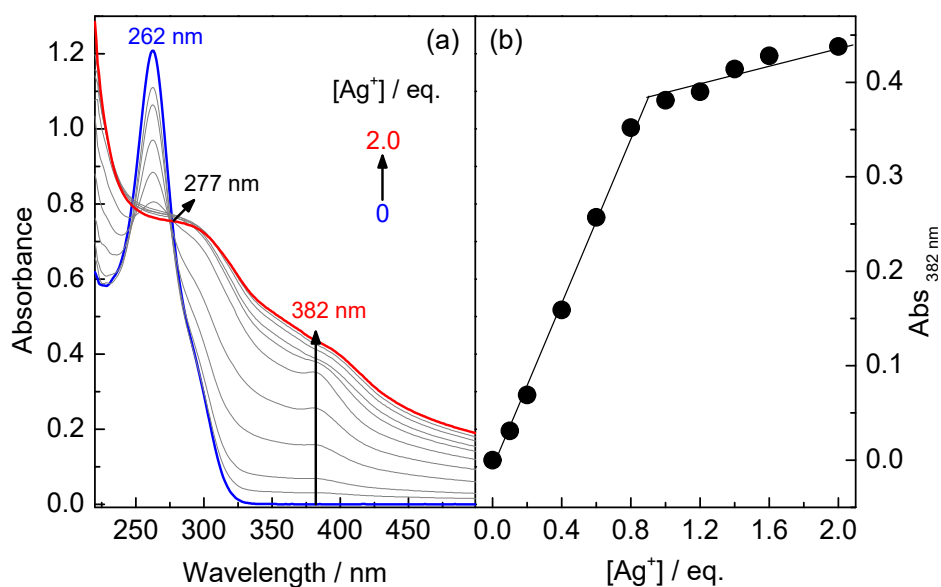

**Fig. S3** (a) Absorption spectra of 4-MPBA in the presence of  $\text{Ag}^+$  of increasing concentration in 100 mM  $\text{Na}_2\text{CO}_3$ - $\text{NaHCO}_3$  buffer of pH 10.5 and (b) plots of absorbance at 382 nm versus equivalent of  $\text{Ag}^+$ . [4-MPBA] = 100  $\mu\text{M}$ , [ $\text{Ag}^+$ ] = 0 - 2.0 eq.

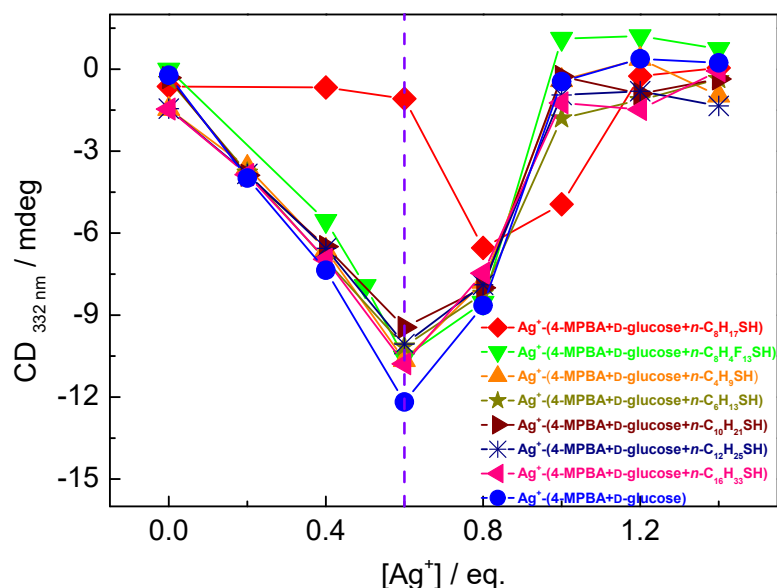

**Fig. S4** Plots versus  $\text{Ag}^+$  concentration of CD signal at 332 nm of  $\text{Ag}^+$ -(4-MPBA+D-glucose+ $n$ - $\text{C}_n\text{H}_{2n+1}\text{SH}$ ),  $\text{Ag}^+$ -(4-MPBA+D-glucose+ $n$ - $\text{C}_8\text{H}_4\text{F}_{13}\text{SH}$ ) and  $\text{Ag}^+$ -(4-MPBA+D-glucose) in 100 mM  $\text{Na}_2\text{CO}_3$ - $\text{NaHCO}_3$  buffer of pH 10.5. [4-MPBA] = 100  $\mu\text{M}$ , [ $n$ - $\text{C}_n\text{H}_{2n+1}\text{SH}$ ] = 100  $\mu\text{M}$ , [ $n$ - $\text{C}_8\text{H}_4\text{F}_{13}\text{SH}$ ] = 100  $\mu\text{M}$ , [D-glucose] = 3 mM, [ $\text{Ag}^+$ ] = 0 - 1.4 eq.

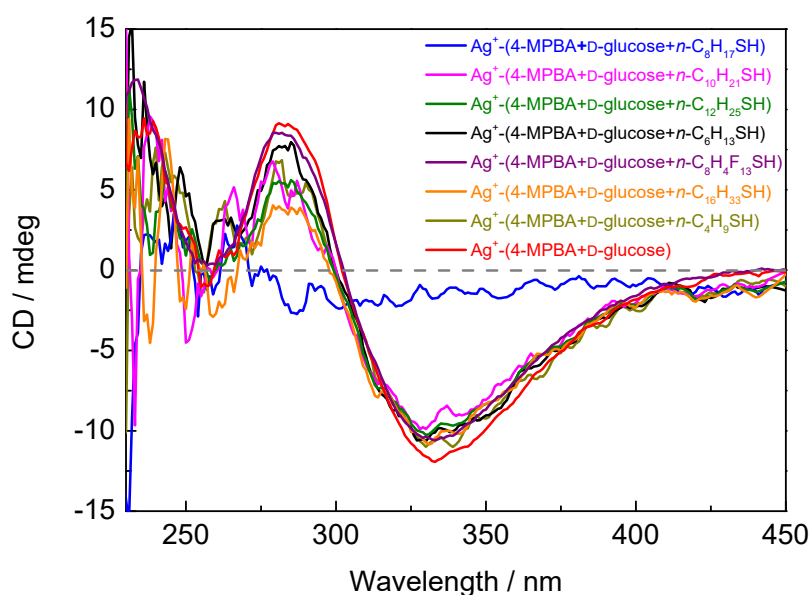

**Fig. S5** CD spectra of  $\text{Ag}^+$ -(4-MPBA+D-glucose+ $n$ - $\text{C}_n\text{H}_{2n+1}\text{SH}$ ),  $\text{Ag}^+$ -(4-MPBA+D-glucose+ $n$ - $\text{C}_8\text{H}_4\text{F}_{13}\text{SH}$ ) and  $\text{Ag}^+$ -(4-MPBA+D-glucose) in 100 mM  $\text{Na}_2\text{CO}_3$ - $\text{NaHCO}_3$  buffer of pH 10.5. [4-MPBA] = 100  $\mu\text{M}$ , [ $n$ - $\text{C}_n\text{H}_{2n+1}\text{SH}$ ] = 100  $\mu\text{M}$ , [ $n$ - $\text{C}_8\text{H}_4\text{F}_{13}\text{SH}$ ] = 100  $\mu\text{M}$ , [D-glucose] = 3 mM; [ $\text{Ag}^+$ ] = 60  $\mu\text{M}$  (red line), 120  $\mu\text{M}$  (other lines).

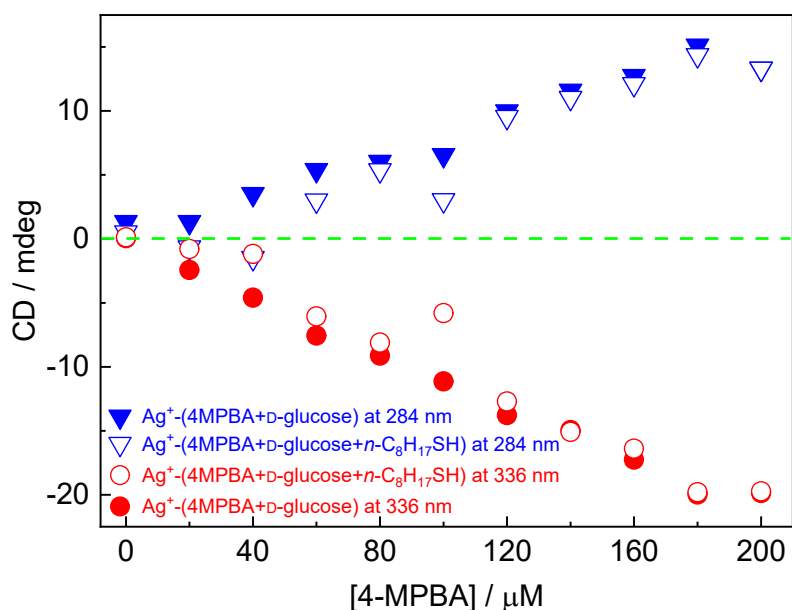

**Fig. S6** Plots of CD signals of  $\text{Ag}^+$ -(4-MPBA+D-glucose) and  $\text{Ag}^+$ -(4-MPBA+D-glucose+n- $\text{C}_8\text{H}_{17}\text{SH}$ ) of varying concentration of 4-MPBA. [4-MPBA] = 0 - 200  $\mu\text{M}$  (solid), [4-MPBA] + [n- $\text{C}_8\text{H}_{17}\text{SH}$ ] = 200  $\mu\text{M}$  (hollow), [D-glucose] = 3 mM.

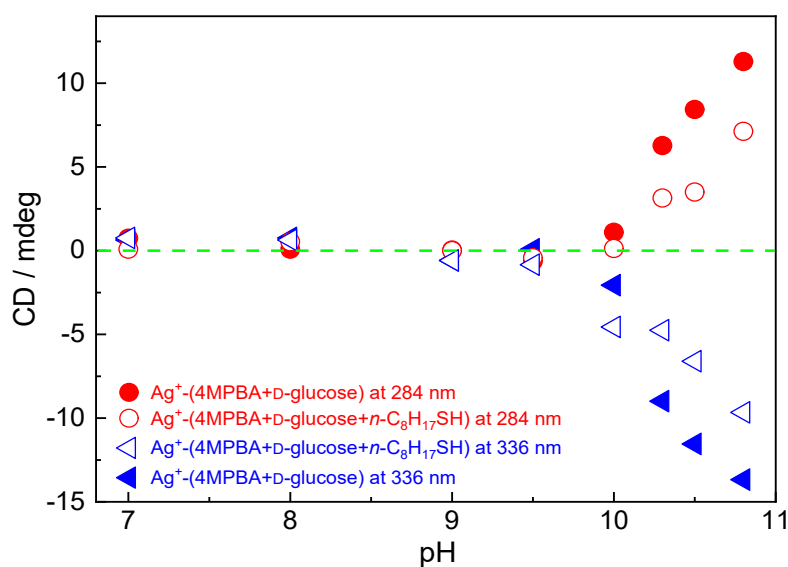

**Fig. S7** Plots of CD signals of  $\text{Ag}^+$ -(4-MPBA+D-glucose) and  $\text{Ag}^+$ -(4-MPBA+D-glucose+n- $\text{C}_8\text{H}_{17}\text{SH}$ ) in solutions of varying the pH. [4-MPBA] = 100  $\mu\text{M}$ , [n- $\text{C}_8\text{H}_{17}\text{SH}$ ] = 100  $\mu\text{M}$ , [D-glucose] = 3 mM; [ $\text{Ag}^+$ ] = 60  $\mu\text{M}$  (solid), 160  $\mu\text{M}$  (hollow). pH = 7, 8, 9, 9.5, 10, 10.3, 10.5, or 10.8.

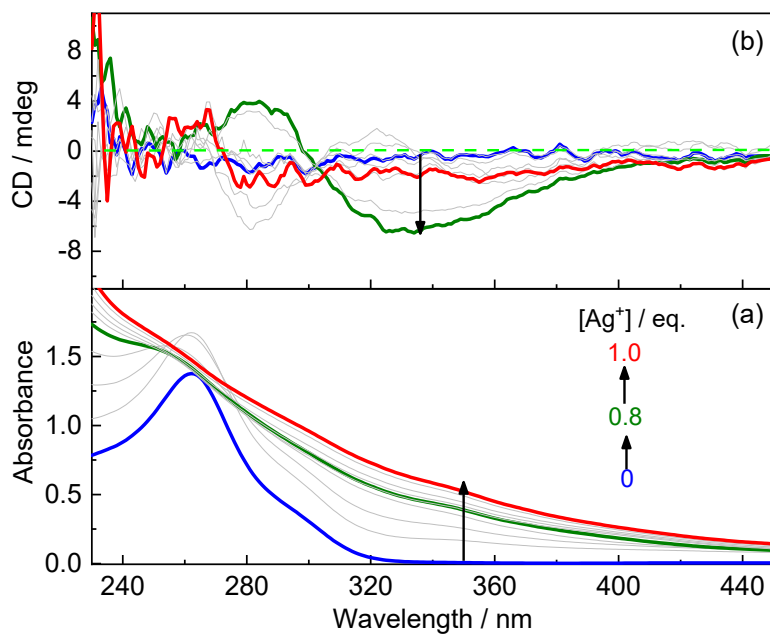

**Fig. S8** Absorption (a) and CD (b) spectra of (4-MPBA+D-glucose+n-C<sub>8</sub>H<sub>17</sub>SH) in the presence of Ag<sup>+</sup> of increasing concentration in 100 mM Na<sub>2</sub>CO<sub>3</sub>-NaHCO<sub>3</sub> buffer of pH 10.5. [4-MPBA] = [n-C<sub>8</sub>H<sub>17</sub>SH] = 100 μM, [D-glucose] = 3 mM, [Ag<sup>+</sup>] = 0 - 2.0 eq.

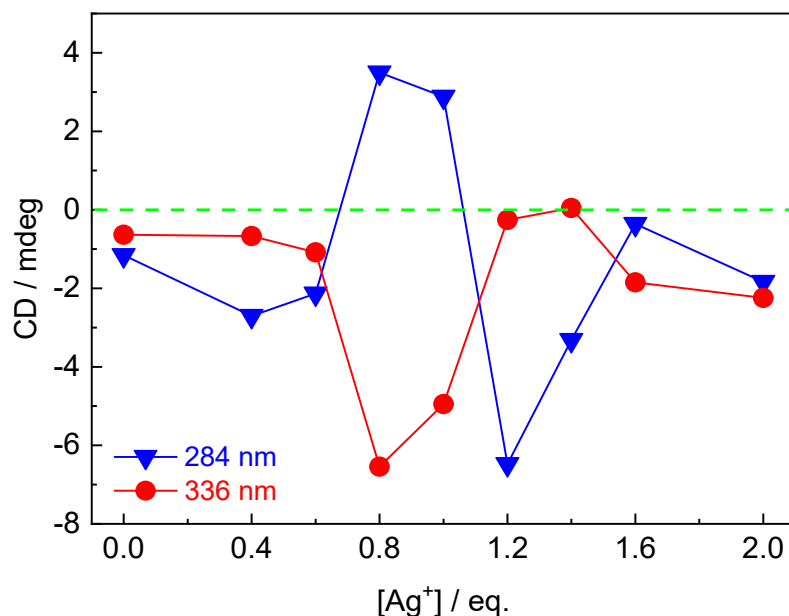

**Fig. S9** Plots of CD signals of Ag<sup>+</sup>-(4-MPBA+D-glucose+n-C<sub>8</sub>H<sub>17</sub>SH) in 100 mM Na<sub>2</sub>CO<sub>3</sub>-NaHCO<sub>3</sub> buffer solution of pH 10.5 versus equivalent of Ag<sup>+</sup>. [4-MPBA] = [n-C<sub>8</sub>H<sub>17</sub>SH] = 100 μM, [D-glucose] = 3 mM, [Ag<sup>+</sup>] = 0 - 2.0 eq.

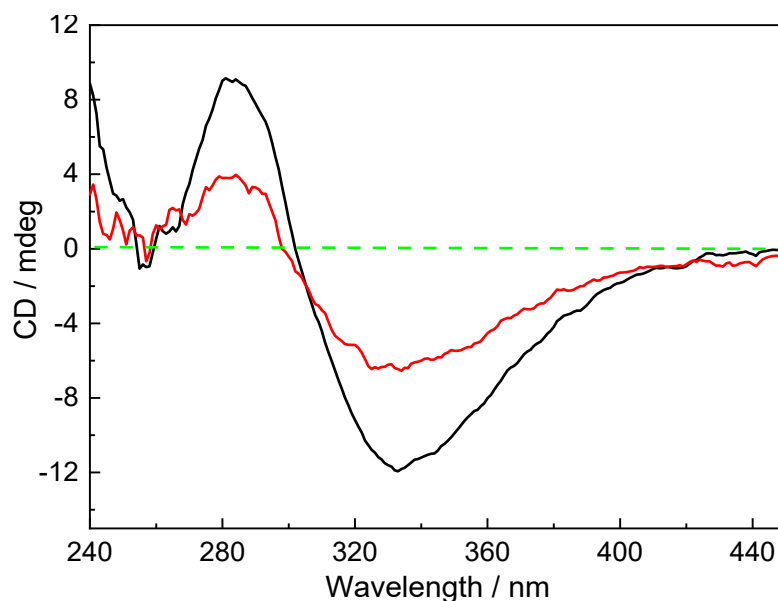

**Fig. S10** CD spectra of  $\text{Ag}^+$ -(4-MPBA+D-glucose) (black line) and  $\text{Ag}^+$ -(4-MPBA+D-glucose+ $n\text{-C}_8\text{H}_{17}\text{SH}$ ) (red line) in 100 mM  $\text{Na}_2\text{CO}_3\text{-NaHCO}_3$  buffer solution of pH 10.5. [4-MPBA] = 100  $\mu\text{M}$ , [ $n\text{-C}_8\text{H}_{17}\text{SH}$ ] = 100  $\mu\text{M}$ , [D-glucose] = 3 mM; [ $\text{Ag}^+$ ] = 60  $\mu\text{M}$  (black line), 160  $\mu\text{M}$  (red line).

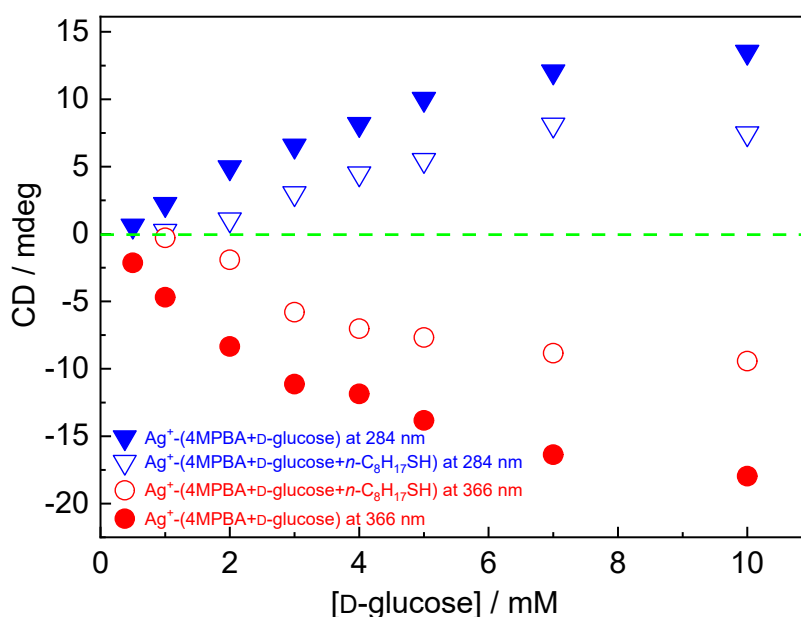

**Fig. S11** Plots of CD signals of  $\text{Ag}^+$ -(4-MPBA+D-glucose) and  $\text{Ag}^+$ -(4-MPBA+D-glucose+ $n\text{-C}_8\text{H}_{17}\text{SH}$ ) versus concentration of D-glucose in 100 mM  $\text{Na}_2\text{CO}_3\text{-NaHCO}_3$  buffer solution of pH 10.5. [4-MPBA] = 100  $\mu\text{M}$ , [ $n\text{-C}_8\text{H}_{17}\text{SH}$ ] = 100  $\mu\text{M}$ , [D-glucose] = 0.5 - 10 mM; [ $\text{Ag}^+$ ] = 160  $\mu\text{M}$  (hollow), [ $\text{Ag}^+$ ] = 60  $\mu\text{M}$  (solid).

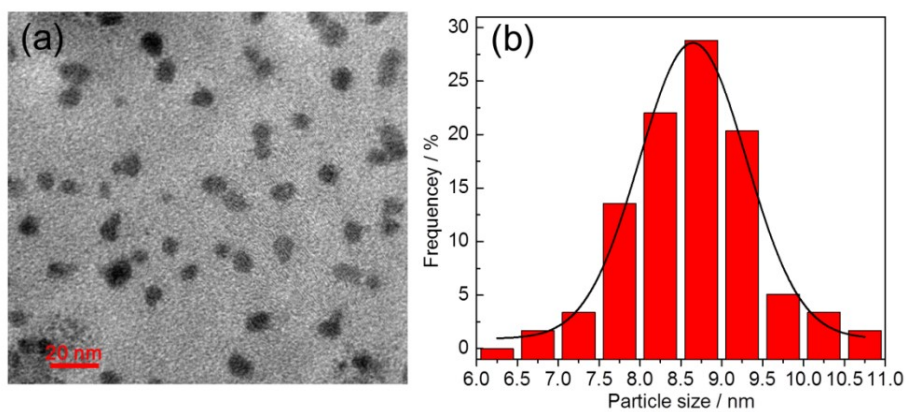

**Fig. S12** TEM image (a) and size distribution (b) of  $\text{Ag}^+$ -(4-MPBA+D-glucose+n- $\text{C}_8\text{H}_{17}\text{SH}$ ) coordination polymers.  $[\text{4-MPBA}] = [n\text{-C}_8\text{H}_{17}\text{SH}] = 25 \mu\text{M}$ ,  $[\text{Ag}^+] = 40 \mu\text{M}$ ,  $[\text{D-glucose}] = 3 \text{ mM}$ .

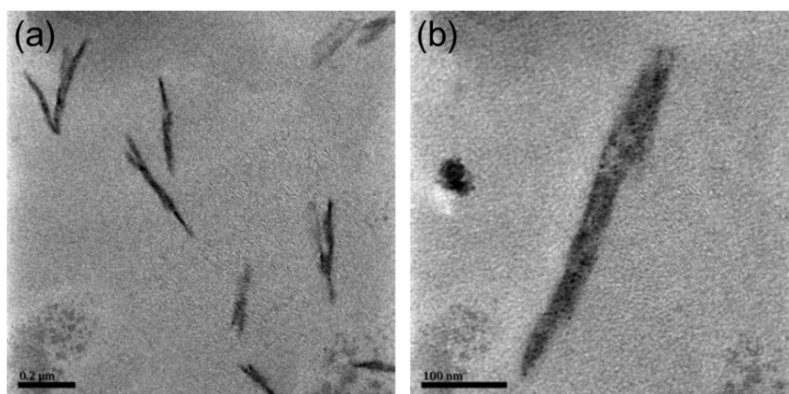

**Fig. S13** TEM images of chain-like  $\text{Ag}^+$ -(4-MPBA+D-glucose) coordination polymers.  $[\text{4-MPBA}] = 50 \mu\text{M}$ ,  $[\text{Ag}^+] = 30 \mu\text{M}$ ,  $[\text{D-glucose}] = 3 \text{ mM}$ .



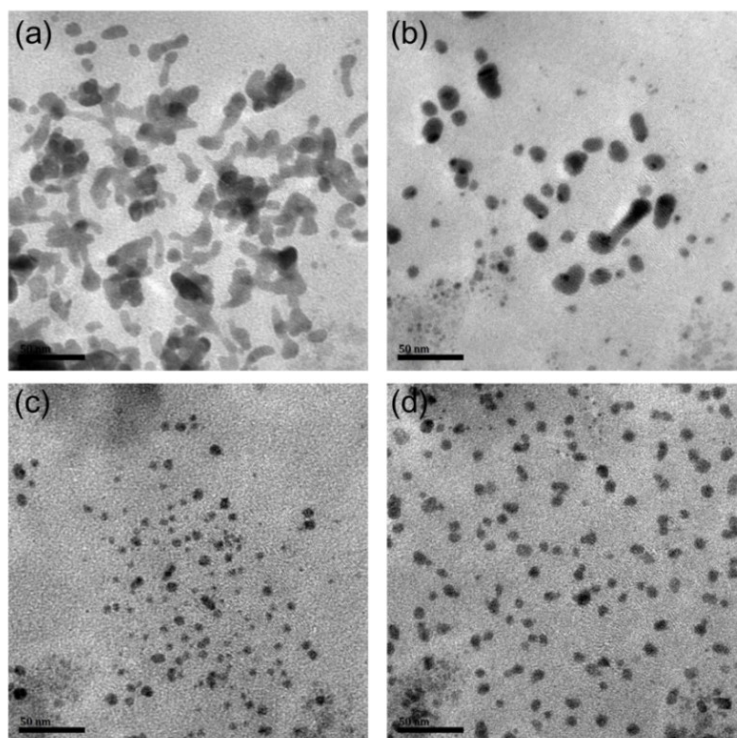

**Fig. S14** TEM images of  $\text{Ag}^+$ -(4-MPBA+D-glucose+ $n$ -C<sub>8</sub>H<sub>17</sub>SH) coordination polymers of varying concentration of D-glucose. The samples were prepared by dropping solutions onto carbon-coated copper grids followed by solvent evaporation in vacuum. [4-MPBA] = [ $n$ -C<sub>8</sub>H<sub>17</sub>SH] = 25  $\mu\text{M}$ , [ $\text{Ag}^+$ ] = 40  $\mu\text{M}$ ; [D-glucose] = 0.1 mM (a), 0.25 mM (b), 0.5 mM (c), 3 mM (d).

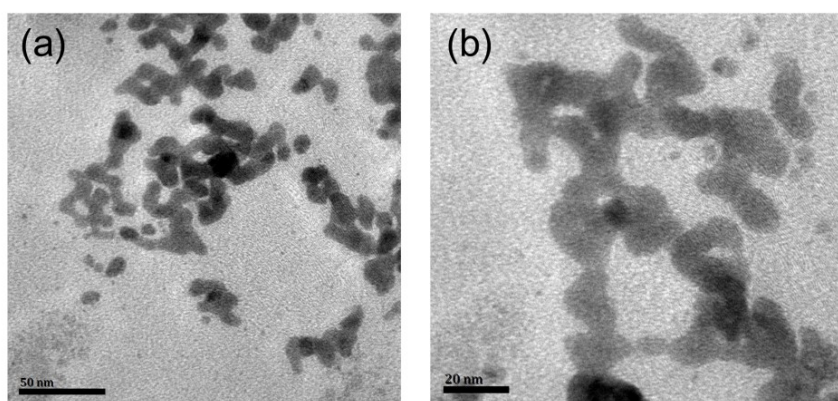

**Fig. S15** TEM images of  $\text{Ag}^+$ -(4-MPBA+ $n$ -C<sub>8</sub>H<sub>17</sub>SH) coordination polymers. [4-MPBA] = [ $n$ -C<sub>8</sub>H<sub>17</sub>SH] = 25  $\mu\text{M}$ , [ $\text{Ag}^+$ ] = 40  $\mu\text{M}$ .

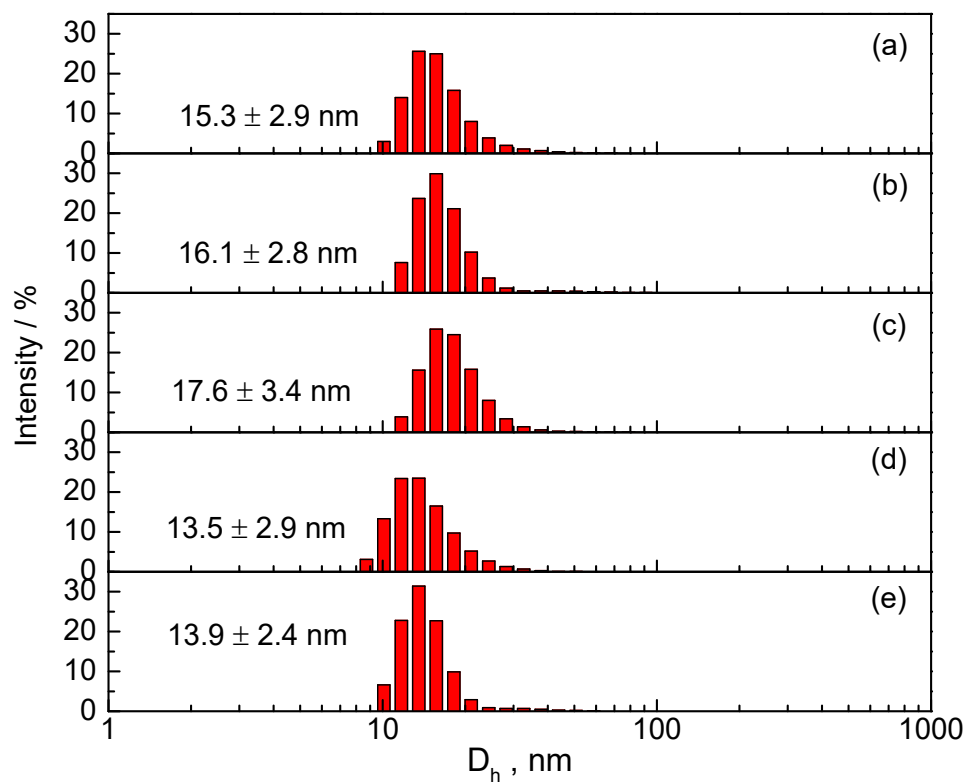

**Fig. S16** DLS measured hydrodynamic diameters ( $D_h$ ) of  $\text{Ag}^+$ -(4-MPBA+D-glucose+n-C<sub>8</sub>H<sub>17</sub>SH) of varying concentration in 100 mM Na<sub>2</sub>CO<sub>3</sub>-NaHCO<sub>3</sub> buffer of pH 10.5. [4-MPBA] = [n-C<sub>8</sub>H<sub>17</sub>SH] = 5  $\mu\text{M}$  (a), 10  $\mu\text{M}$  (b), 15  $\mu\text{M}$  (c), 25  $\mu\text{M}$  (d), 50  $\mu\text{M}$  (e); [D-glucose] = 3 mM, [Ag<sup>+</sup>] = 0.8 eq.

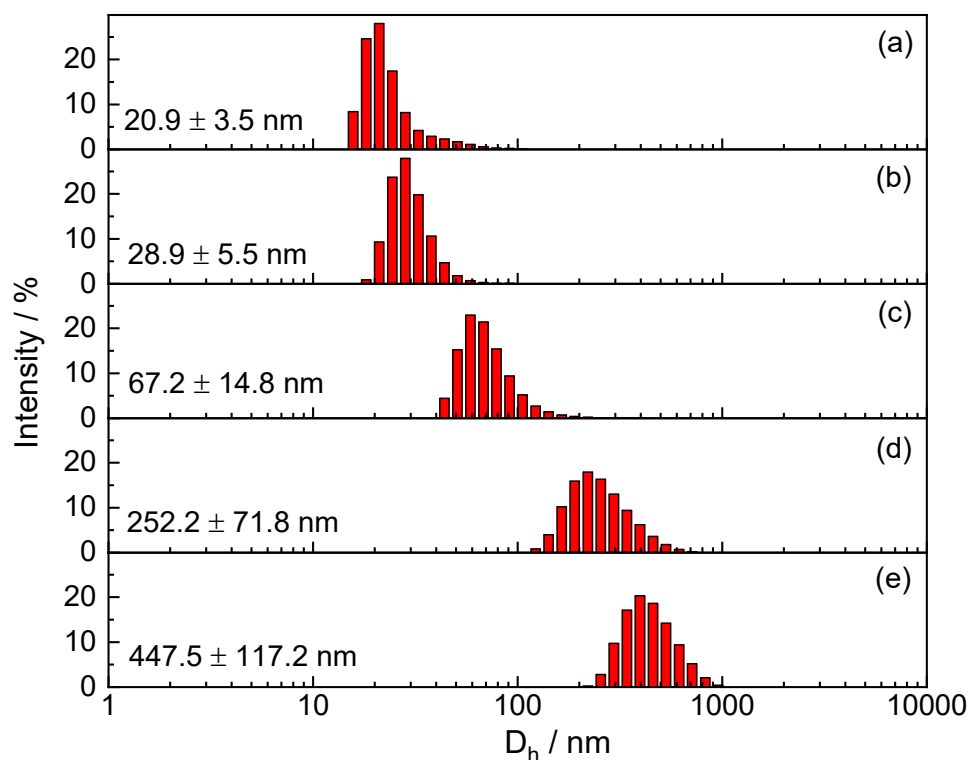

**Fig. S17** DLS measured hydrodynamic diameters ( $D_h$ ) of  $\text{Ag}^+$ -(4-MPBA+D-glucose) of varying concentration in 100 mM  $\text{Na}_2\text{CO}_3$ - $\text{NaHCO}_3$  buffer of pH 10.5. [4-MPBA] = 10  $\mu\text{M}$  (a), 20  $\mu\text{M}$  (b), 30  $\mu\text{M}$  (c), 50  $\mu\text{M}$  (d), 100  $\mu\text{M}$  (e); [D-glucose] = 3 mM,  $[\text{Ag}^+] = 0.6 \text{ eq}$ .

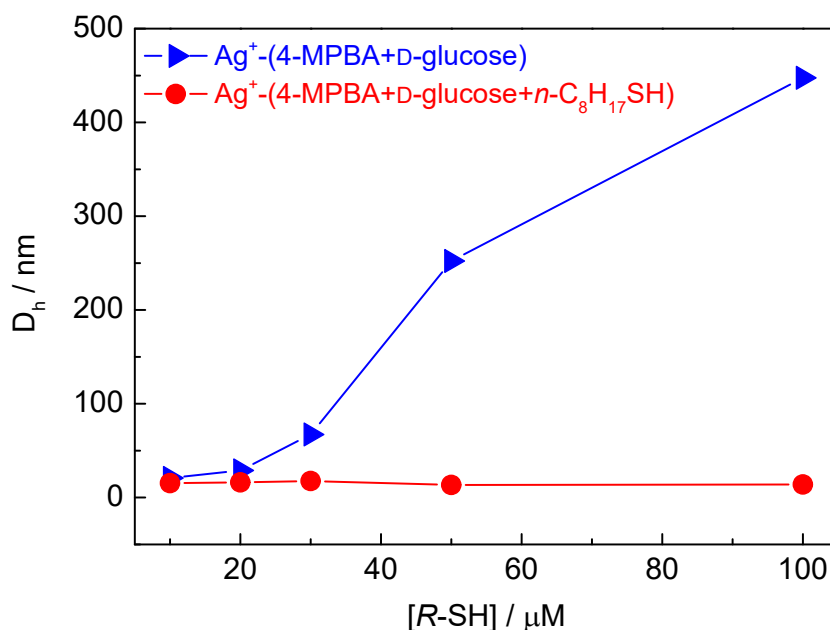

**Fig. S18** Plots of DLS measured hydrodynamic diameter ( $D_h$ ) of  $\text{Ag}^+$ -(4-MPBA+D-glucose) and  $\text{Ag}^+$ -(4-MPBA+D-glucose+ $n\text{-C}_8\text{H}_{17}\text{SH}$ ) of varying concentration in 100 mM  $\text{Na}_2\text{CO}_3$ - $\text{NaHCO}_3$  buffer of pH 10.5. [R-SH] = 10 - 100  $\mu\text{M}$ , [D-glucose] = 3 mM;  $[\text{Ag}^+] = 0.6 \text{ eq}$  (blue), 0.8 eq (red).

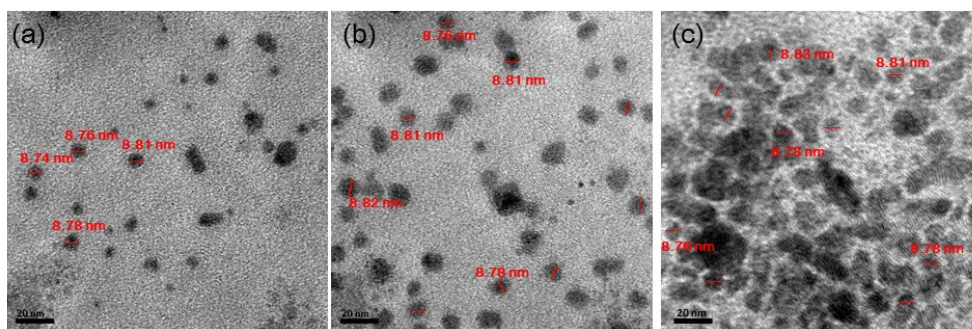

**Fig. S19** TEM images of  $\text{Ag}^+$ -(4-MPBA+D-glucose+n- $\text{C}_8\text{H}_{17}\text{SH}$ ) of varying concentration in 100 mM  $\text{Na}_2\text{CO}_3$ - $\text{NaHCO}_3$  buffer solution of pH 10.5. [4-MPBA] = [n- $\text{C}_8\text{H}_{17}\text{SH}$ ] = 10  $\mu\text{M}$  (a), 25  $\mu\text{M}$  (b), 50  $\mu\text{M}$  (c); [D-glucose] = 3 mM,  $[\text{Ag}^+] = 0.8$  ([4-MPBA] + [n- $\text{C}_8\text{H}_{17}\text{SH}$ ]).

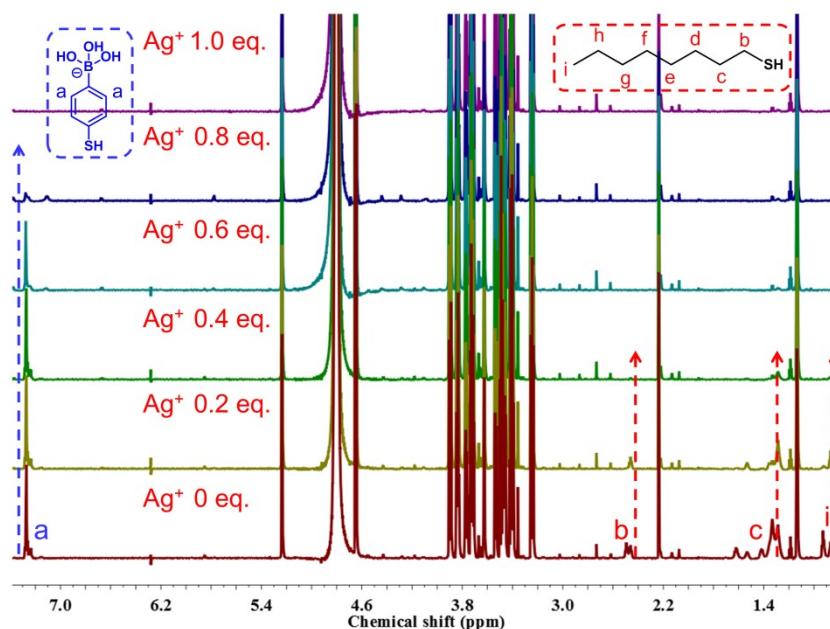

**Fig. S20** Partial  $^1\text{H}$  NMR spectra of  $\text{Ag}^+$ -(4-MPBA+D-glucose+n- $\text{C}_8\text{H}_{17}\text{SH}$ ) in 100 mM  $\text{Na}_2\text{CO}_3$ - $\text{NaHCO}_3$  buffer of pH 10.5 in  $\text{D}_2\text{O}$  using acetone as an internal standard. [4-MPBA] = [n- $\text{C}_8\text{H}_{17}\text{SH}$ ] = 200  $\mu\text{M}$ , [D-glucose] = 3 mM;  $[\text{Ag}^+] = 0 - 400$   $\mu\text{M}$ .

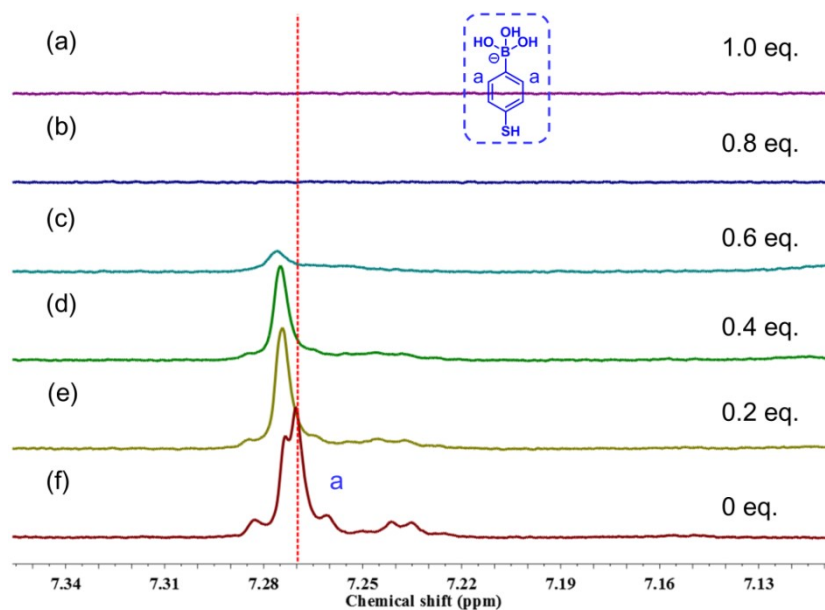

**Fig. S21** Partial  $^1\text{H}$  NMR spectra of 4-MPBA in  $\text{Ag}^+$ -(4-MPBA+D-glucose) in 100 mM  $\text{Na}_2\text{CO}_3$ - $\text{NaHCO}_3$  buffer of pH 10.5 in  $\text{D}_2\text{O}$  using acetone as an internal standard.  $[\text{4-MPBA}] = 200 \mu\text{M}$ ,  $[\text{D-glucose}] = 3 \text{ mM}$ ;  $[\text{Ag}^+] = 0 - 200 \mu\text{M}$ .

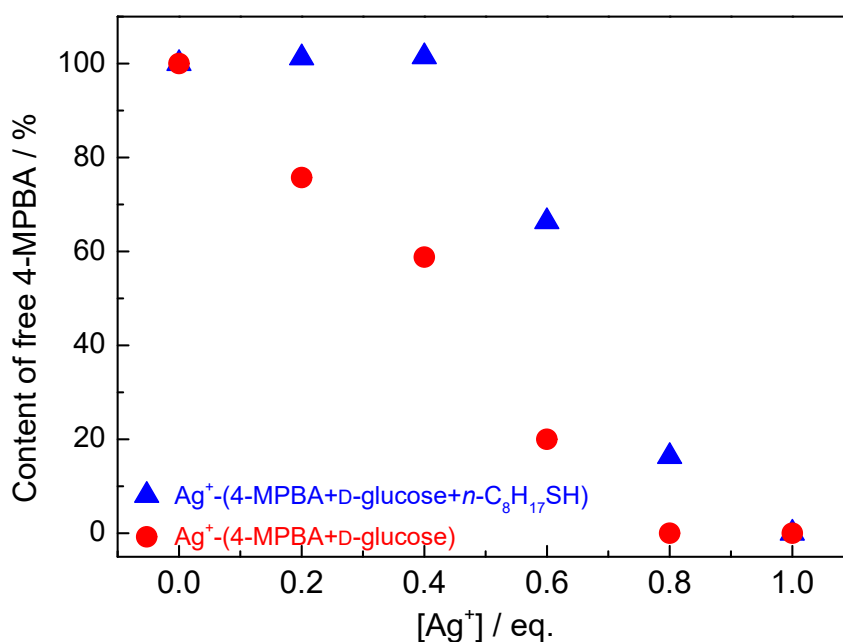

**Fig. S22** Contents of free 4-MPBA calculated by  $^1\text{H}$  NMR integrals versus added equivalent of  $\text{Ag}^+$  of  $\text{Ag}^+$ -(4-MPBA+D-glucose+ $n\text{-C}_8\text{H}_{17}\text{SH}$ ) (blue) and  $\text{Ag}^+$ -(4-MPBA+D-glucose) (red) in 100 mM  $\text{Na}_2\text{CO}_3$ - $\text{NaHCO}_3$  buffer of pH 10.5 in  $\text{D}_2\text{O}$  using acetone as an internal standard.  $[\text{4-MPBA}] = 200 \mu\text{M}$ ,  $[\text{*n*-C}_8\text{H}_{17}\text{SH}] = 200 \mu\text{M}$ ,  $[\text{D-glucose}] = 3 \text{ mM}$ ;  $[\text{Ag}^+] = 0 - 1.0 \text{ eq.}$

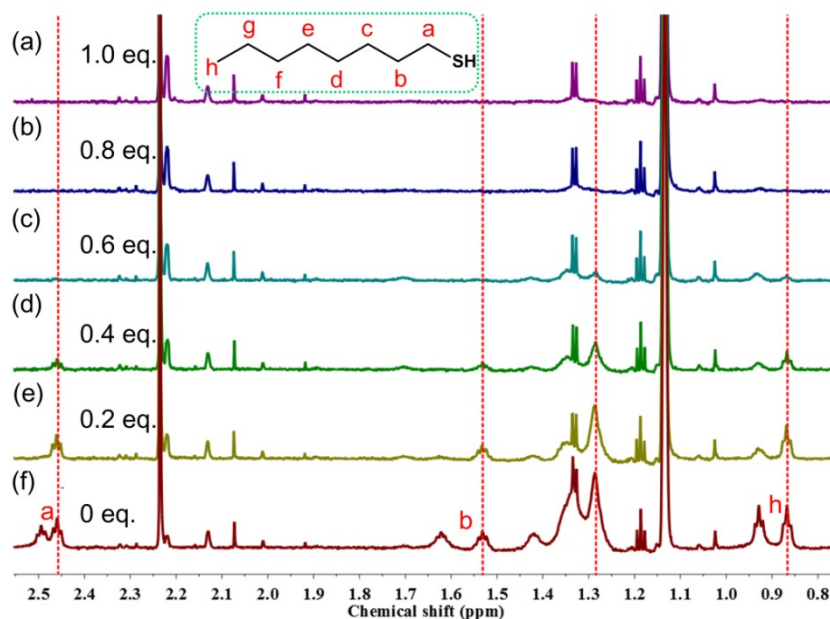

**Fig. S23** Partial  $^1\text{H}$  NMR spectra of  $n\text{-C}_8\text{H}_{17}\text{SH}$  in  $\text{Ag-SC}_8\text{H}_{17-n}$  in 100 mM  $\text{Na}_2\text{CO}_3\text{-NaHCO}_3$  buffer of pH 10.5 in  $\text{D}_2\text{O}$  using acetone as an internal standard.  $[n\text{-C}_8\text{H}_{17}\text{SH}] = 200 \mu\text{M}$ ,  $[\text{Ag}^+] = 0 - 200 \mu\text{M}$ .

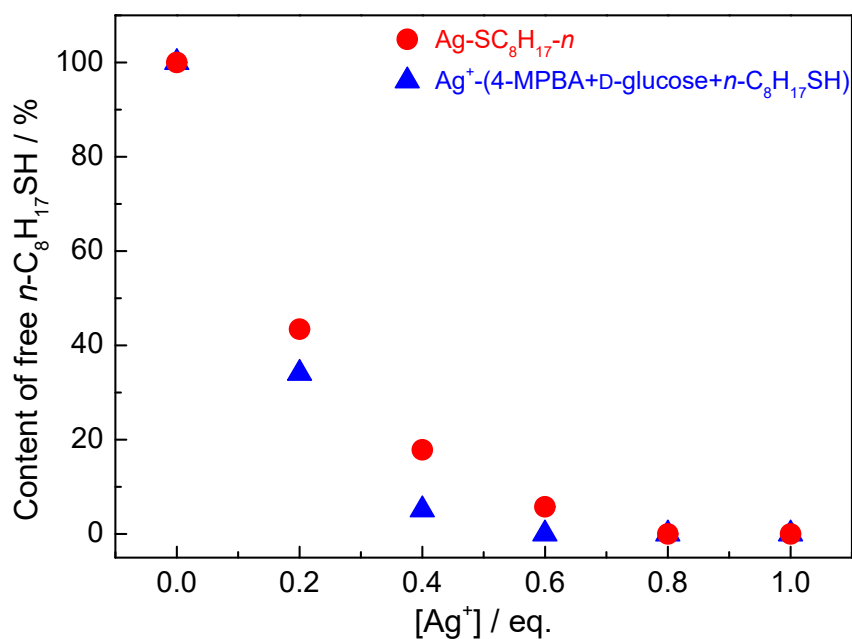

**Fig. S24** Contents of free  $n\text{-C}_8\text{H}_{17}\text{SH}$  calculated by  $^1\text{H}$  NMR integrals versus added equivalent of  $\text{Ag}^+$  of  $\text{Ag}^+\text{-(4-MPBA+D-glucose+n-C}_8\text{H}_{17}\text{SH)}$  (blue) and  $\text{Ag-SC}_8\text{H}_{17-n}$  (red) in 100 mM  $\text{Na}_2\text{CO}_3\text{-NaHCO}_3$  buffer of pH 10.5 in  $\text{D}_2\text{O}$  using acetone as an internal standard.  $[4\text{-MPBA}] = 200 \mu\text{M}$ ,  $[n\text{-C}_8\text{H}_{17}\text{SH}] = 200 \mu\text{M}$ ,  $[\text{D-glucose}] = 3 \text{ mM}$ ;  $[\text{Ag}^+] = 0 - 1.0 \text{ eq.}$

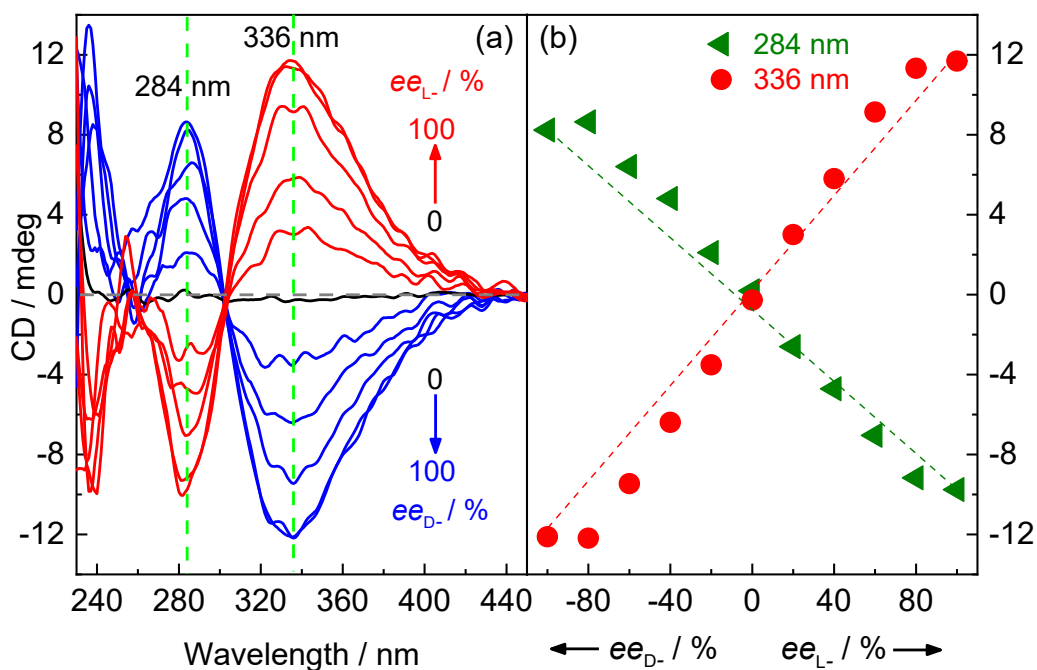

**Fig. S25** (a) CD spectra and (b) plots of CD signals of  $\text{Ag}^+$ -(4-MPBA+glucose) of varying glucose  $ee$  in 100 mM  $\text{Na}_2\text{CO}_3$ - $\text{NaHCO}_3$  buffer of pH 10.5.  $[\text{4-MPBA}] = 100 \mu\text{M}$ ,  $[\text{Ag}^+] = 60 \mu\text{M}$ ,  $[\text{D-glucose}] + [\text{L-glucose}] = 4 \text{ mM}$ .

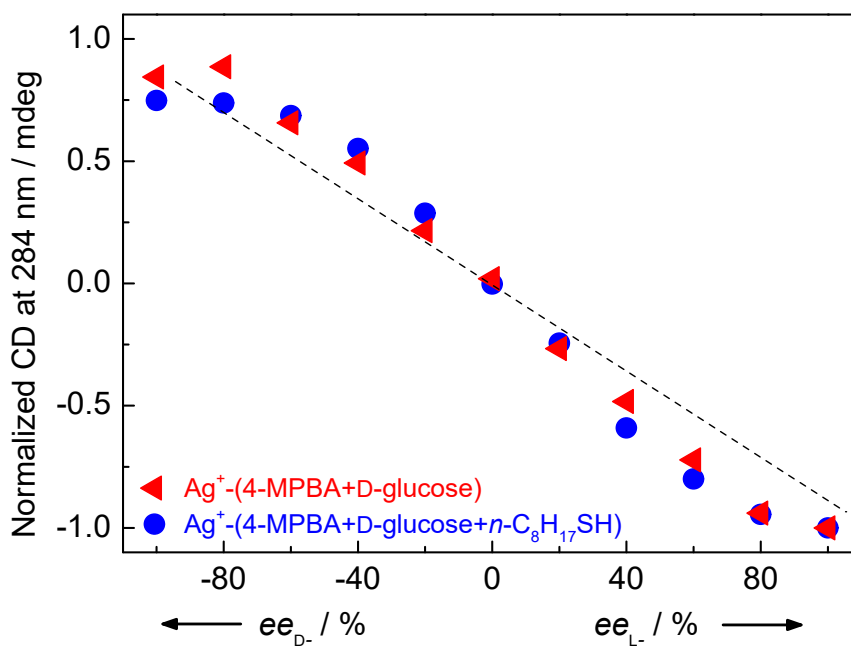

**Fig. S26** Plots of normalized CD signals at 284 nm of  $\text{Ag}^+$ -(4-MPBA+D-glucose) and  $\text{Ag}^+$ -(4-MPBA+D-glucose+n- $\text{C}_8\text{H}_{17}\text{SH}$ ) versus  $ee$  of glucose in 100 mM  $\text{Na}_2\text{CO}_3$ - $\text{NaHCO}_3$  buffer of pH 10.5.  $[\text{4-MPBA}] = [\text{n-C}_8\text{H}_{17}\text{SH}] = 100 \mu\text{M}$ ,  $[\text{D-glucose}] + [\text{L-glucose}] = 4 \text{ mM}$ ;  $[\text{Ag}^+] = 160 \mu\text{M}$  (blue),  $60 \mu\text{M}$  (red).

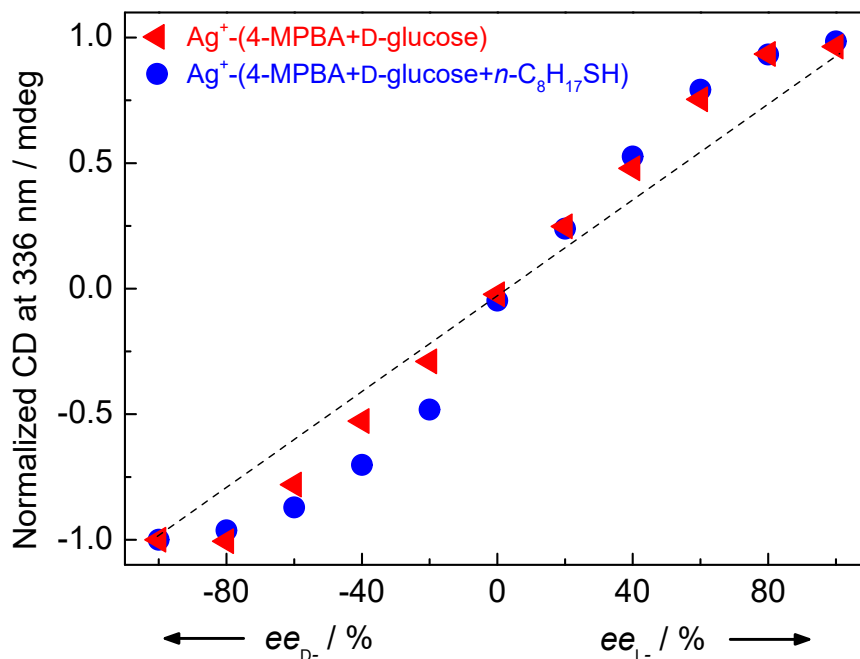

**Fig. S27** Plots of normalized CD signals at 336 nm of  $\text{Ag}^+$ -(4-MPBA+D-glucose) and  $\text{Ag}^+$ -(4-MPBA+D-glucose+n- $\text{C}_8\text{H}_{17}\text{SH}$ ) versus  $ee$  of glucose in 100 mM  $\text{Na}_2\text{CO}_3$ - $\text{NaHCO}_3$  buffer of pH 10.5.  $[\text{4-MPBA}] = [n\text{-C}_8\text{H}_{17}\text{SH}] = 100 \mu\text{M}$ ,  $[\text{D-glucose}] + [\text{L-glucose}] = 4 \text{ mM}$ ;  $[\text{Ag}^+] = 160 \mu\text{M}$  (blue),  $60 \mu\text{M}$  (red).

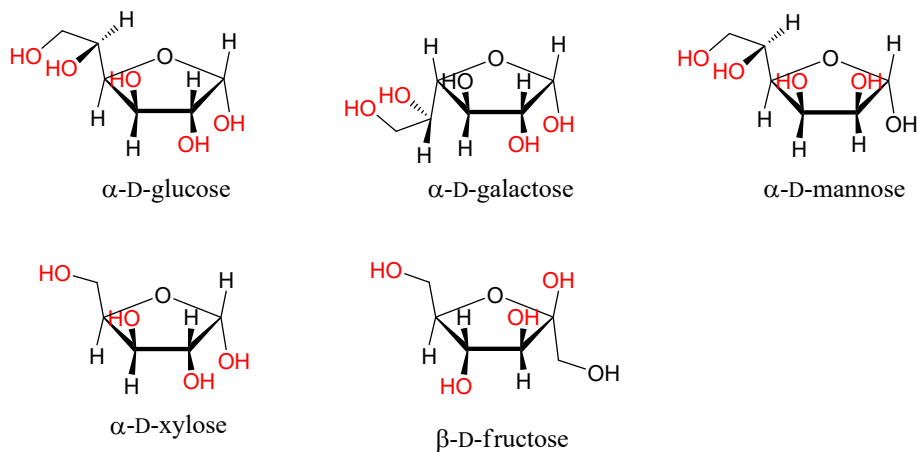

**Scheme S2** Chemical structures of the tested monosaccharides



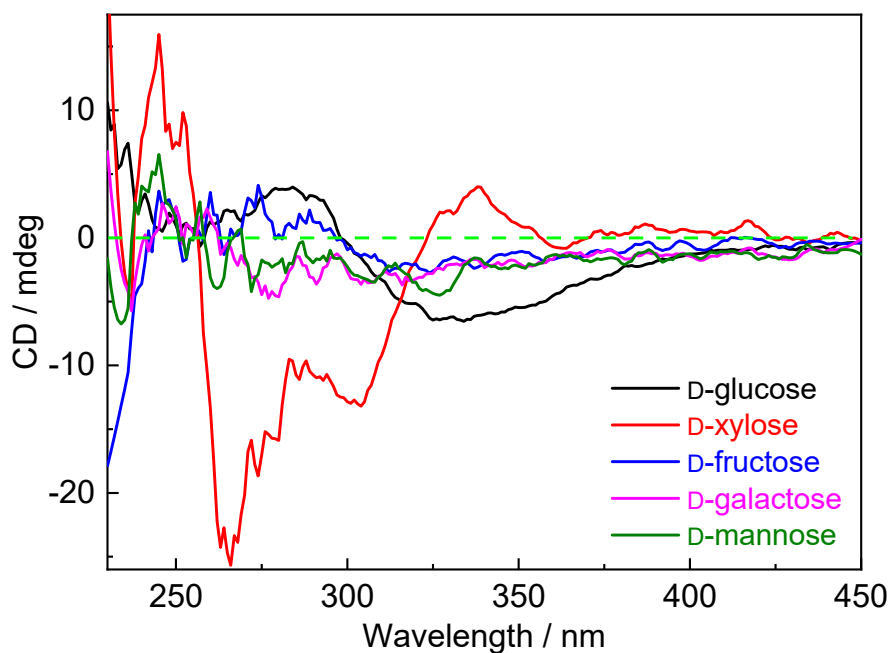

**Fig. S28** CD spectra of  $\text{Ag}^+$ -(4-MPBA+D-monosaccharide+ $n\text{-C}_8\text{H}_{17}\text{SH}$ ) in 100 mM  $\text{Na}_2\text{CO}_3$ - $\text{NaHCO}_3$  buffer of pH 10.5.  $[\text{4-MPBA}] = [n\text{-C}_8\text{H}_{17}\text{SH}] = 100 \mu\text{M}$ ,  $[\text{D-monosaccharide}] = 3 \text{ mM}$ ,  $[\text{Ag}^+] = 160 \mu\text{M}$ .

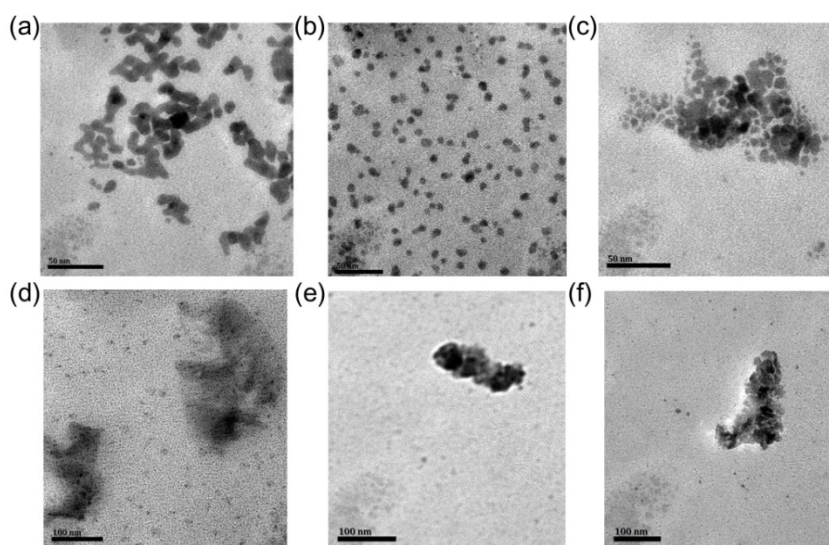

**Fig. S29** TEM images of (a)  $\text{Ag}^+$ -(4-MPBA+ $n\text{-C}_8\text{H}_{17}\text{SH}$ ) and (b-f)  $\text{Ag}^+$ -(4-MPBA+D-monosaccharide+ $n\text{-C}_8\text{H}_{17}\text{SH}$ ). Monosaccharide = D-glucose (b), D-xylose (c), D-fructose (d), D-galactose (e) or D-mannose (f).  $[\text{4-MPBA}] = [n\text{-C}_8\text{H}_{17}\text{SH}] = 25 \mu\text{M}$ ,  $[\text{Ag}^+] = 40 \mu\text{M}$ ,  $[\text{D-monosaccharide}] = 3 \text{ mM}$ .

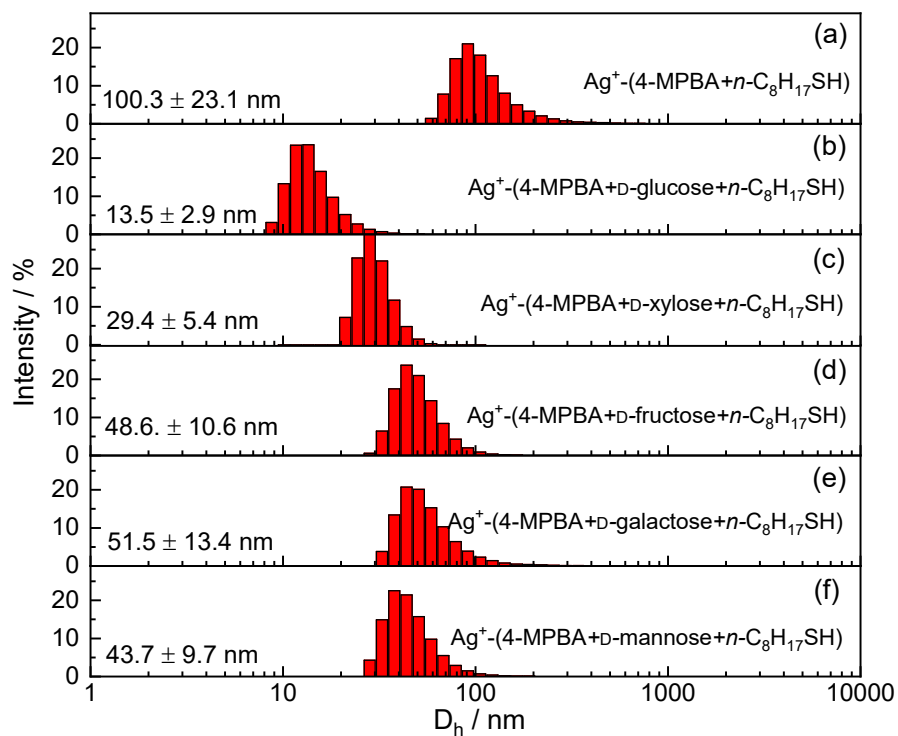

**Fig. S30** DLS measured hydrodynamic diameters ( $D_h$ ) of  $\text{Ag}^+$ -(4-MPBA+ $n$ - $\text{C}_8\text{H}_{17}\text{SH}$ ) polymers (a) and  $\text{Ag}^+$ -(4-MPBA+D-monosaccharide+ $n$ - $\text{C}_8\text{H}_{17}\text{SH}$ ) of monosaccharide being (b) D-glucose, (c) D-xylose, (d) D-fructose, (e) D-galactose or (f) D-mannose. [4-MPBA] = [ $n$ - $\text{C}_8\text{H}_{17}\text{SH}$ ] = 25  $\mu\text{M}$ , [ $\text{Ag}^+$ ] = 40  $\mu\text{M}$ , [D-monosaccharide] = 3 mM.
